# Supplementary material
Source: publisher figshare collection journal article supplement (https://acs.figshare.com/ndownloader/files/4139269)
Supplement: Supplementary file 1 [file 4139269]

## Supporting Information for

The flight of a cytidine deaminase complex with an imperfect transition state analogue inhibitor:  
mass spectrometric evidence for the presence of a trapped water molecule

Gottfried K. Schroeder, Li Zhou, Mark J. Snider, Xian Chen, and Richard Wolfenden

Additional  $^1\text{H}$  NMR and MS spectra, along with Michaelis-Menten plots, uncatalyzed kinetic time course data, van't Hoff plots and ITC results are included herein. This material is available free of charge via the Internet at <http://pubs.acs.org>.

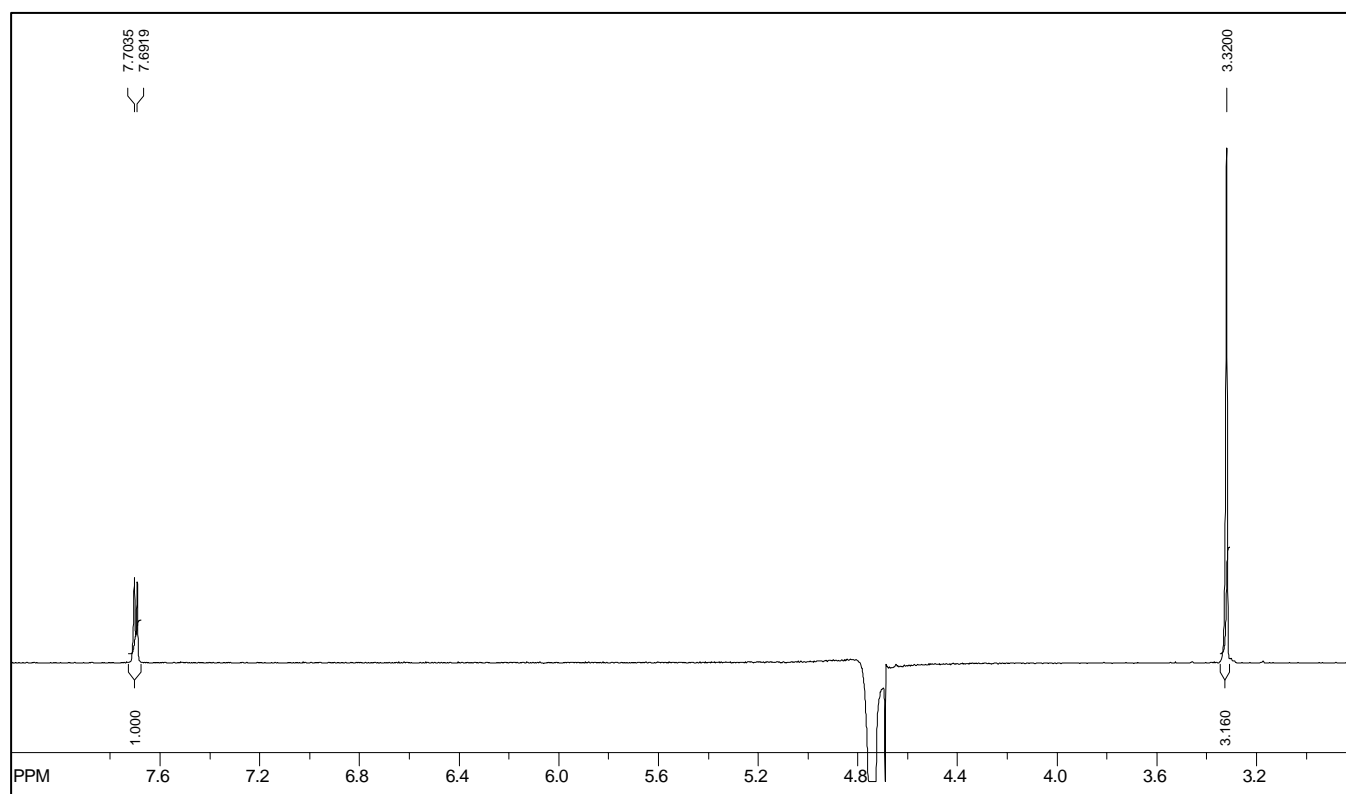

Supporting Information Figure S1.  $^1\text{H}$  NMR spectrum (500 MHz) of recrystallized 1-*N*-methyl-5-fluorocytosine in  $\text{D}_2\text{O}$ .

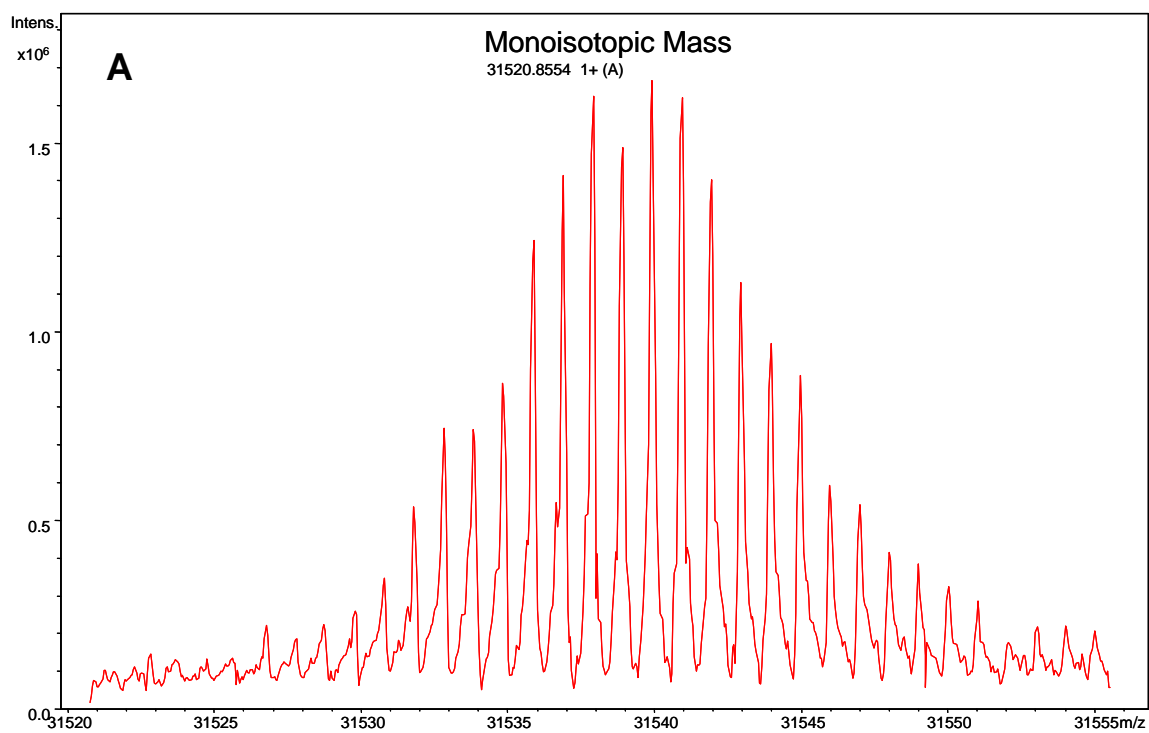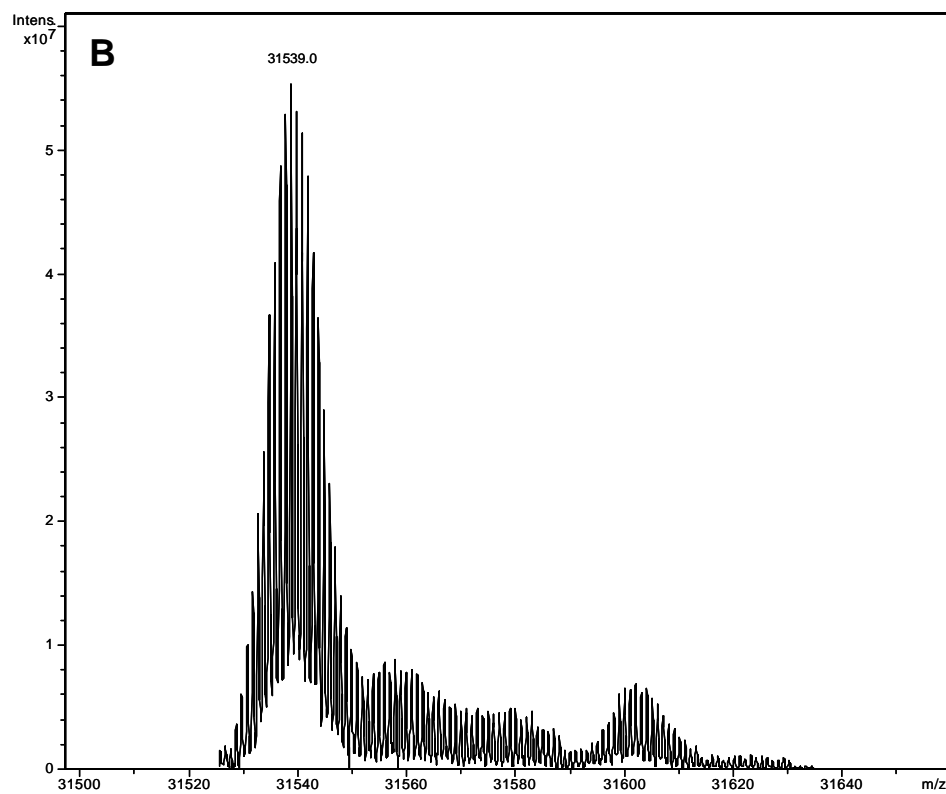

Supporting Information Figure S2. Mass spectrum of the CDA monomer. A) Monoisotopic mass, acquired under denaturing conditions. B) Most abundant isotopic mass, acquired under non-denaturing conditions.

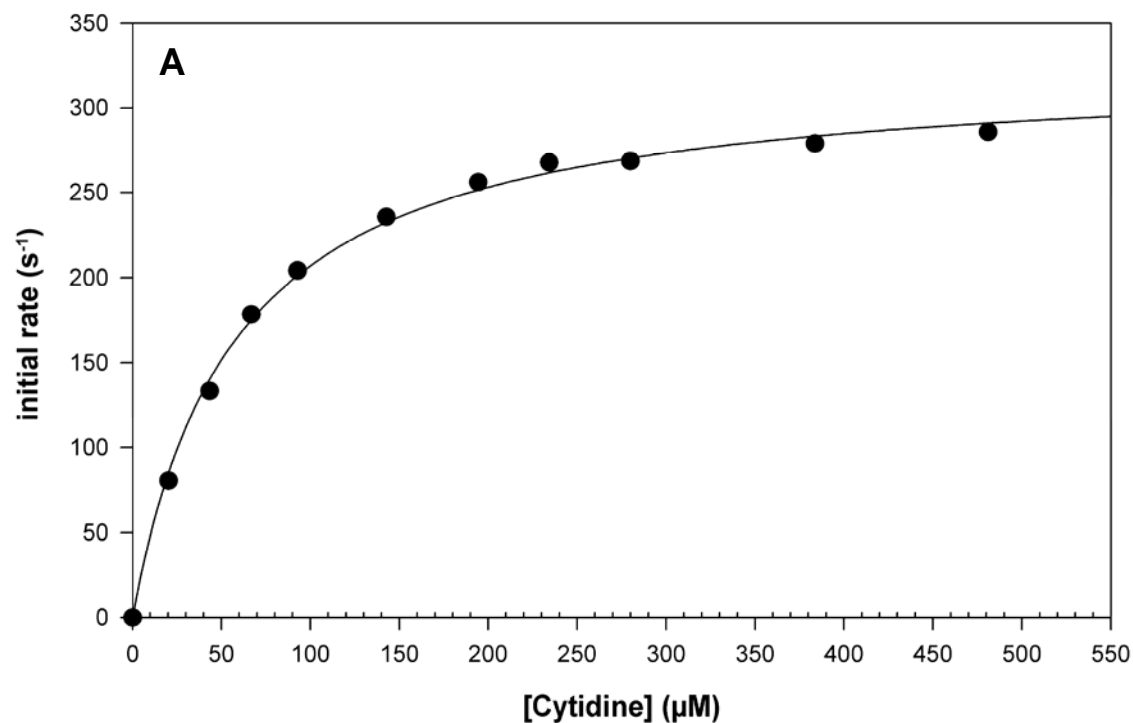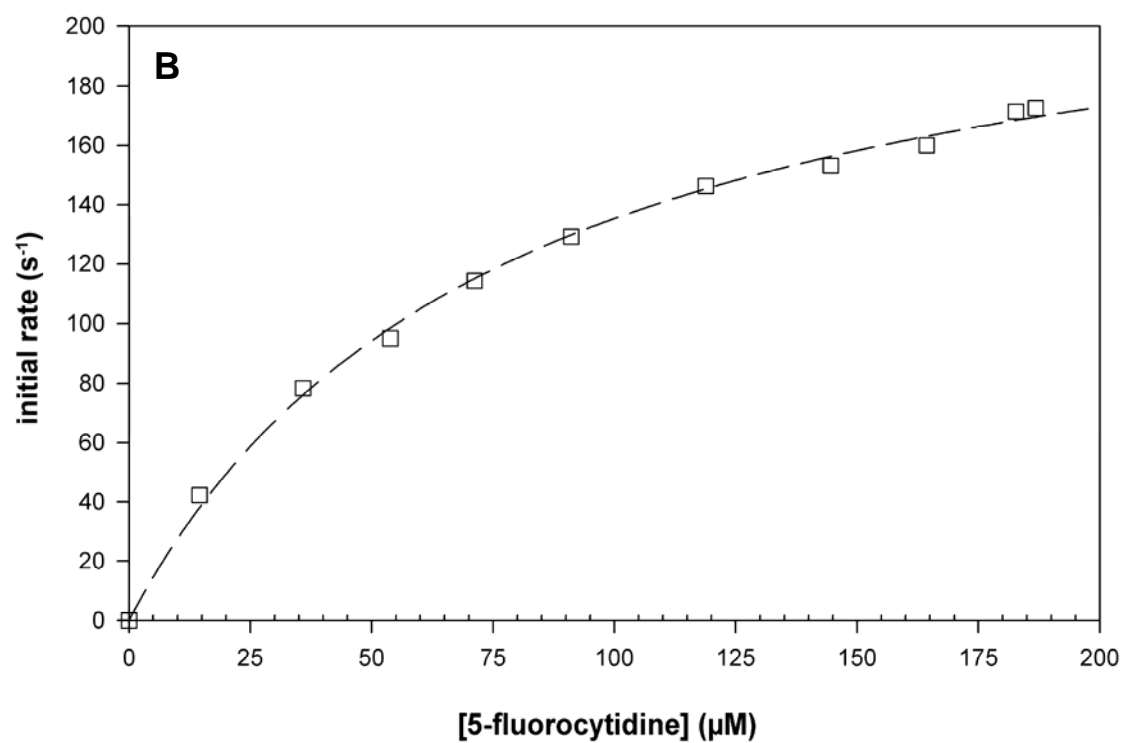

Supporting Information Figure S3. A plot of initial rates for CDA catalyzed deamination versus substrate concentration. (A) Deamination of substrate cytidine fit to the Michaelis-Menten equation (solid line) satisfactorily ( $R^2 = 0.99$ ). B) Deamination of 5-fluorocytidine fit to the Michaelis-Menten equation (dashed line) satisfactorily ( $R^2 = 0.99$ ).

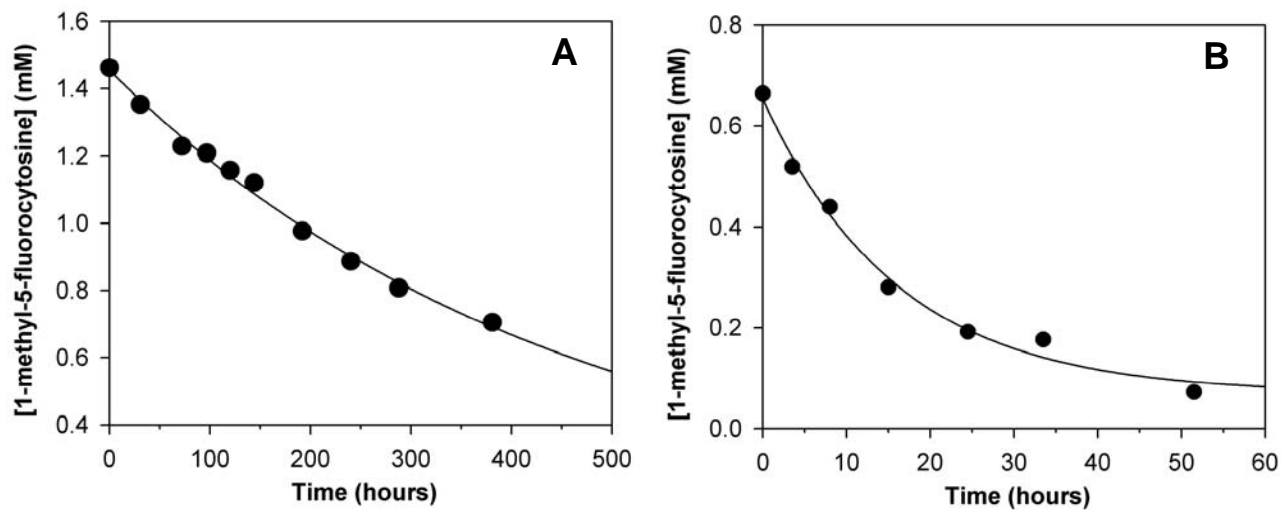

Supporting Information Figure S4. A plot of 1-*N*-methyl-5-fluorocytosine concentration versus time at high temperature under neutral conditions. A) Data collected at 98 °C followed first order exponential decay satisfactorily ( $R^2 = 0.99$ ). B) Data collected at 140 °C followed first order exponential decay satisfactorily ( $R^2 = 0.99$ ).

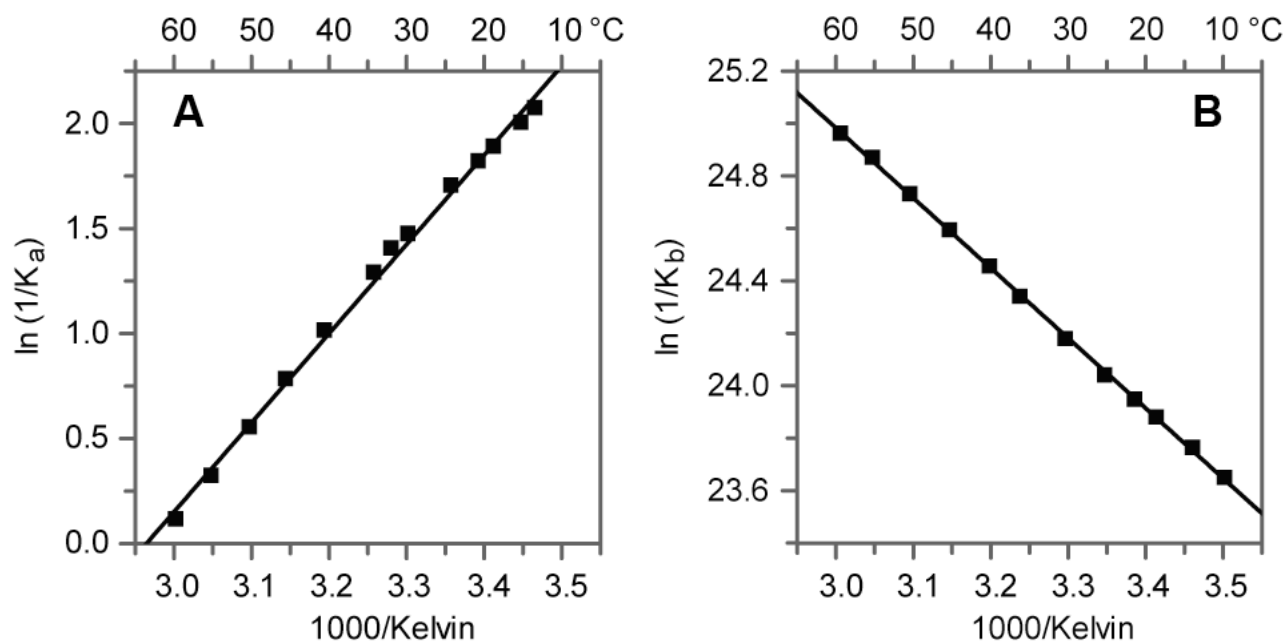

Supporting Information Figure S5. van't Hoff plots of the equilibrium constants for (A) proton dissociation from 5-fluoro-1-methyl-2-oxopyrimidine and (B) addition of hydroxide ion to the 5-fluoro-1,3-dimethyl-2-oxopyrimidinium cation, both obtained from the temperature dependence of their respective  $pK_a$  values.

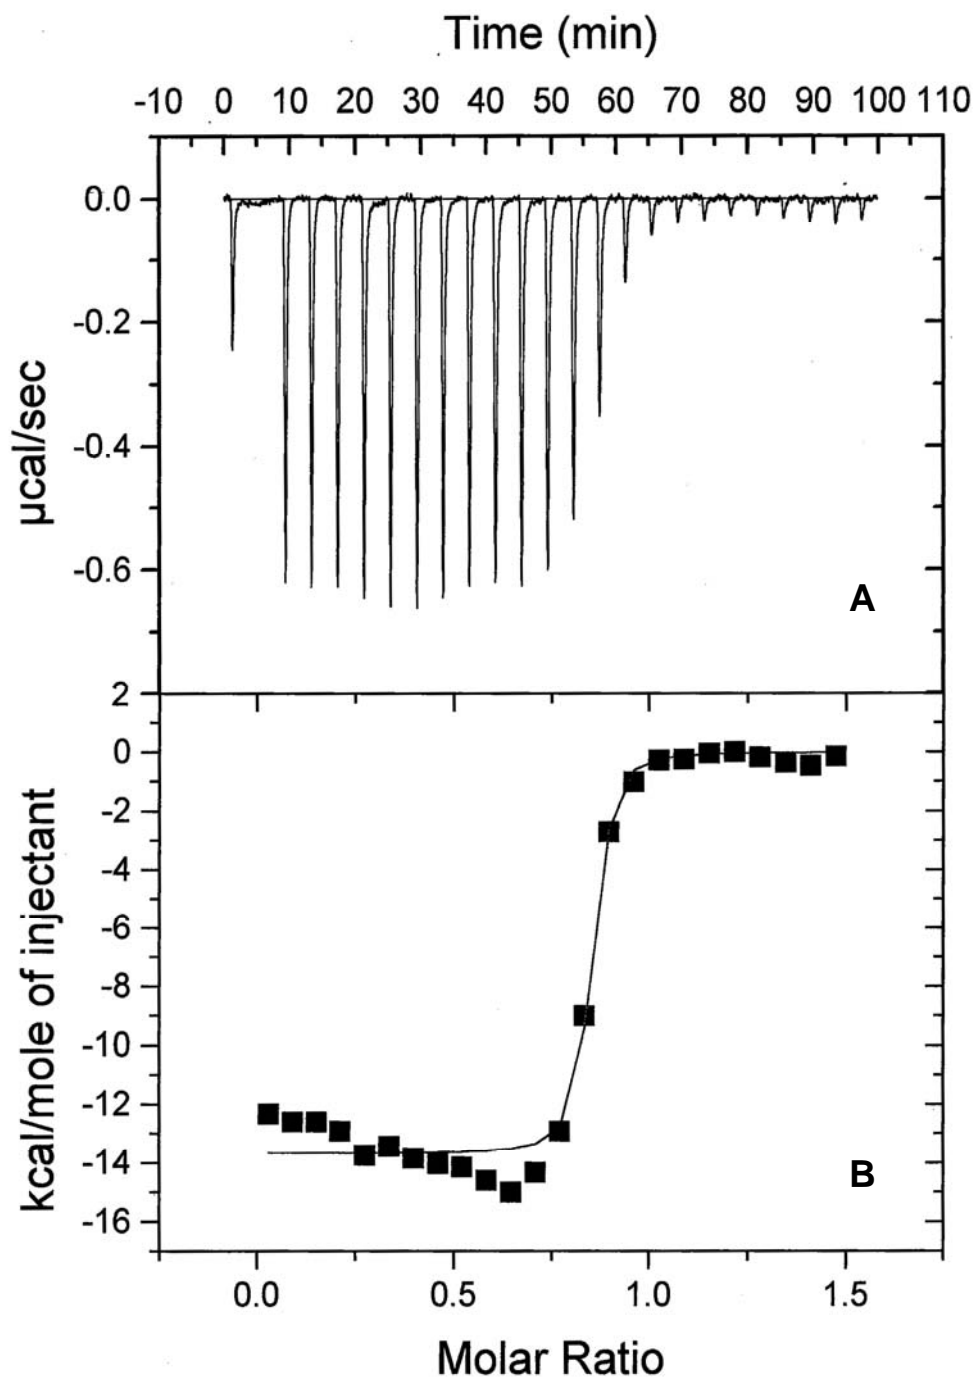

Supporting Information Figure S6. Isothermal calorimetric titration of cytidine deaminase with FZeb at 25 °C in phosphate buffer (0.10 M, pH 7). (A) Heat effects associated with each injection after baseline correction. (B) Integrated heats (■) fitted to a one-site binding model (solid line, best fit curve).
